# Supplementary material for: Glycoalkaloid Composition and Flavonoid Content as Driving Forces of Phytotoxicity in Diploid Potato
Source: MDPI journal article supplement (doi:10.3390/ijms24021657), 2023-01-14

**Supplementary Figure S2.** Subgraphs of top 10 most enriched GO terms (p value  $\leq 0.05$ ) in BP category of DEGs in the (A) A' vs. B' and (B) A' vs. F' comparison groups.

A)

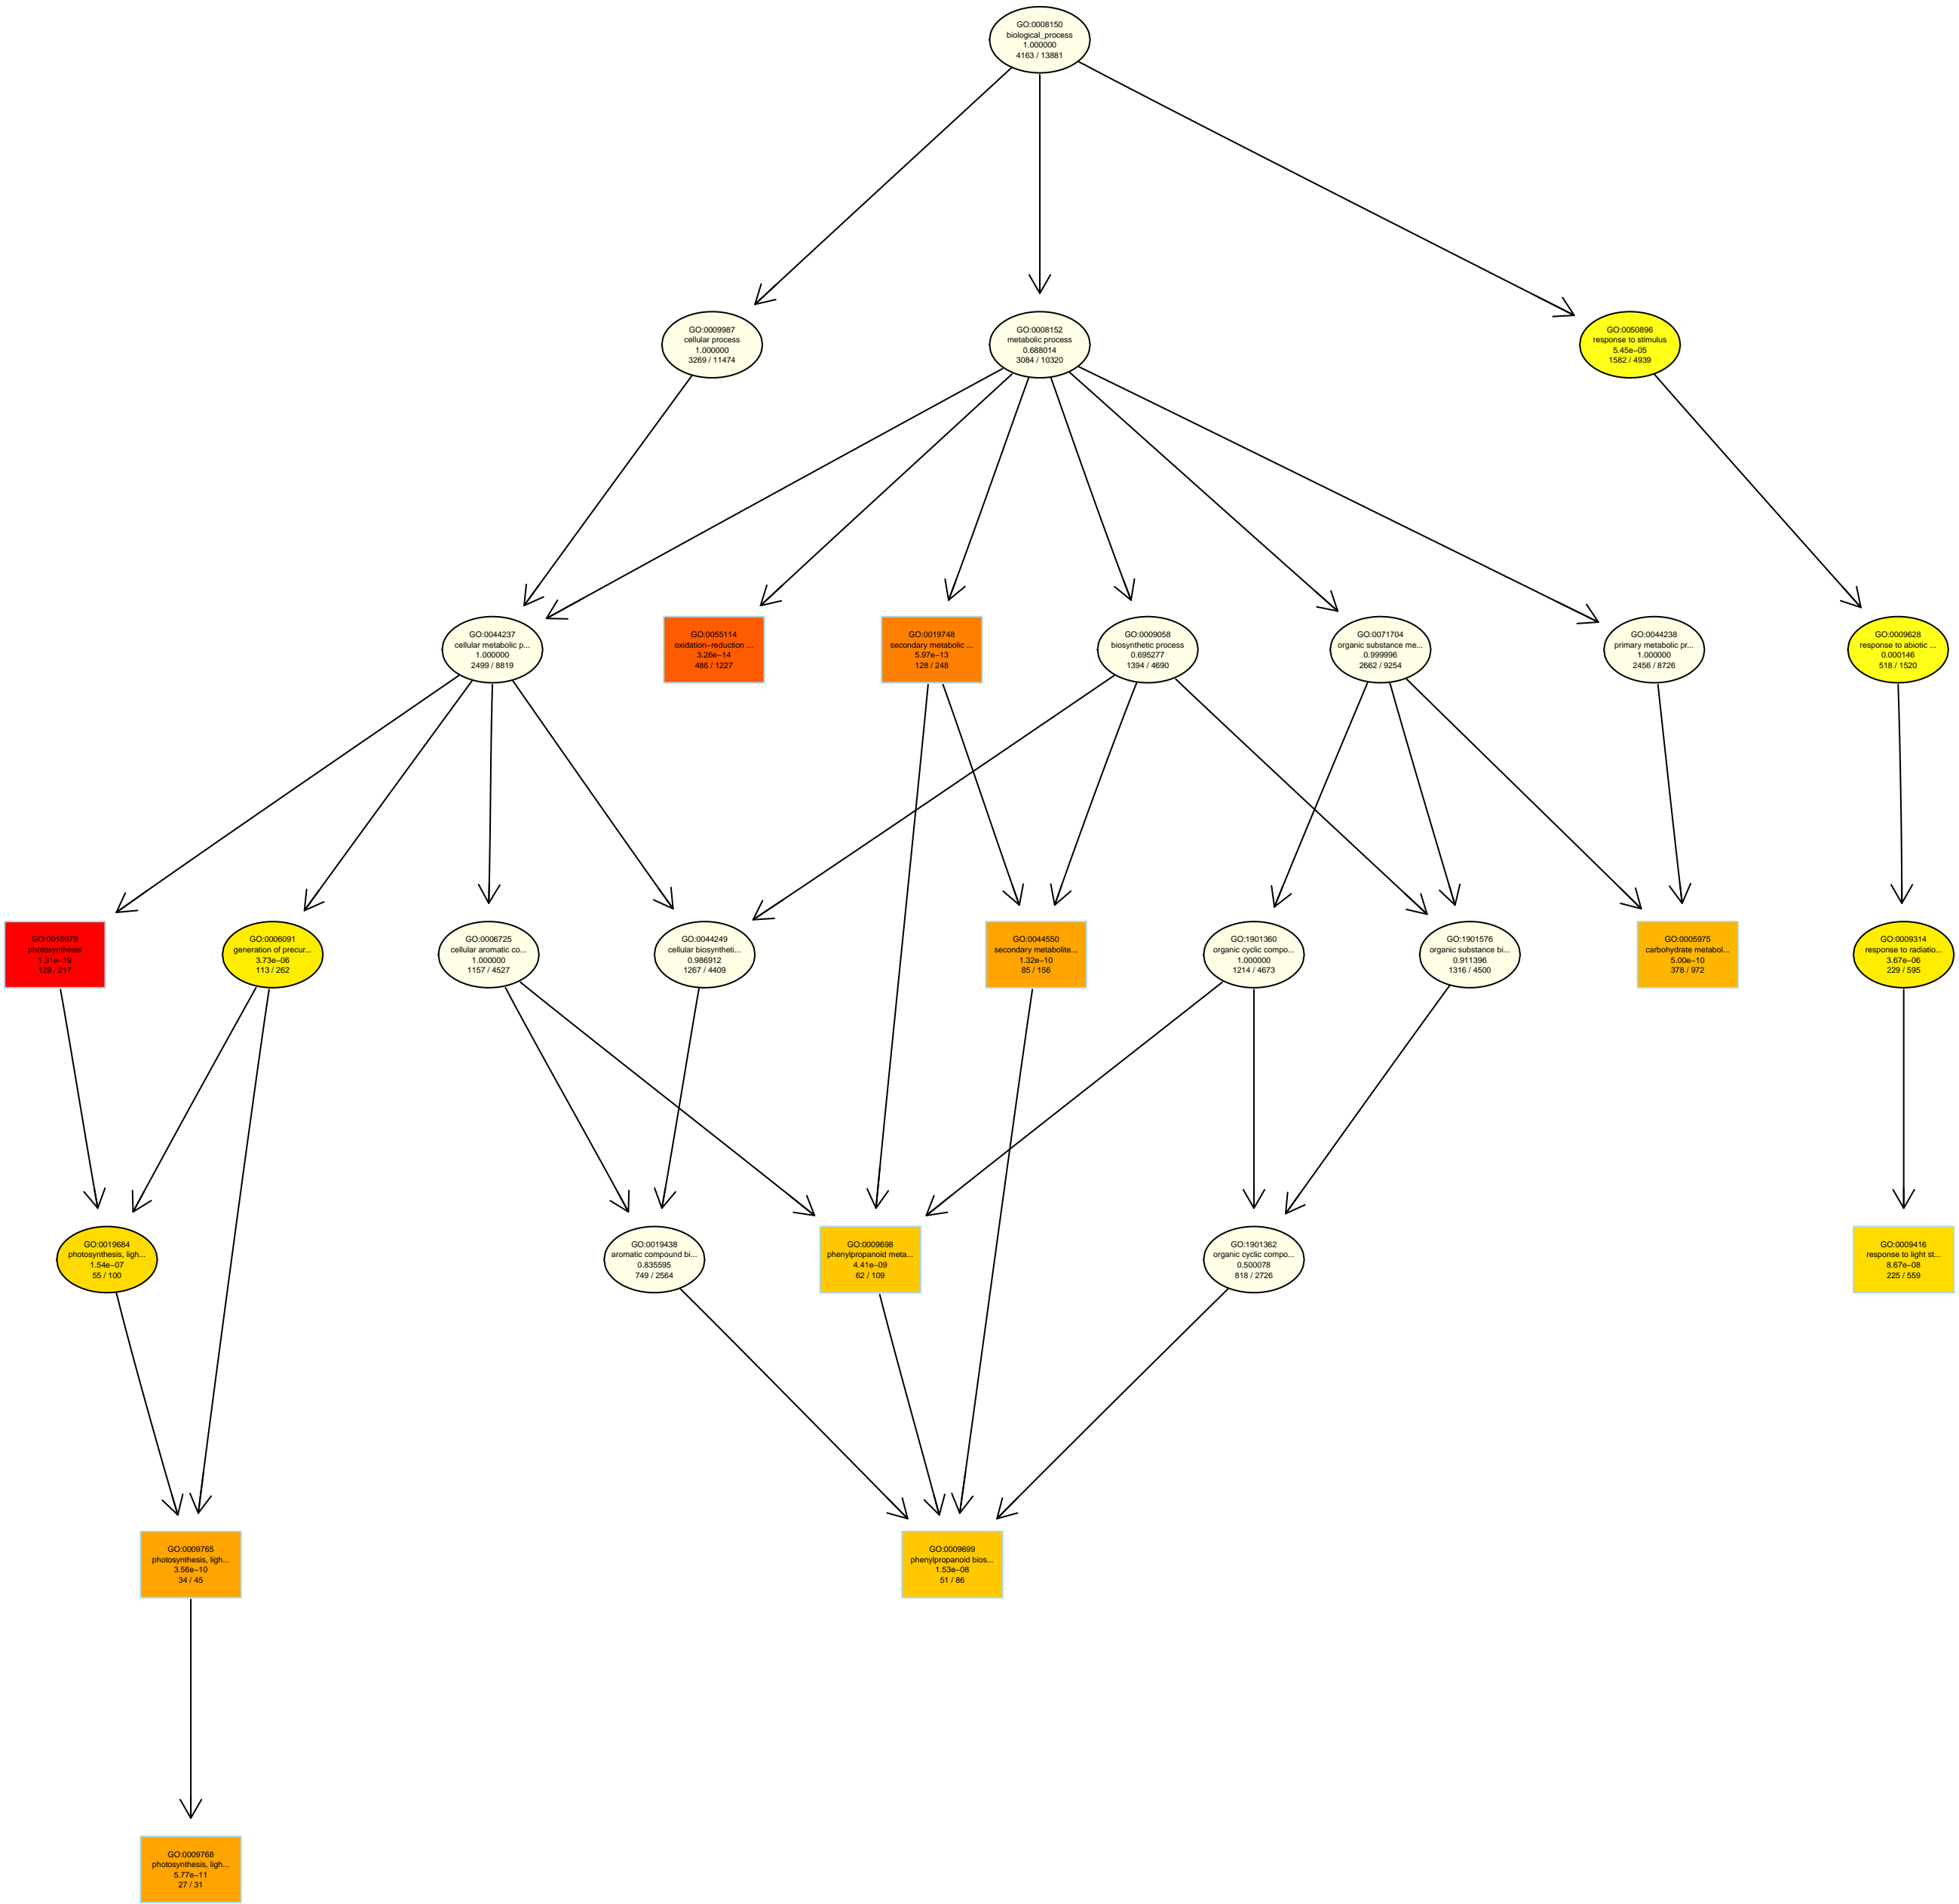

B)

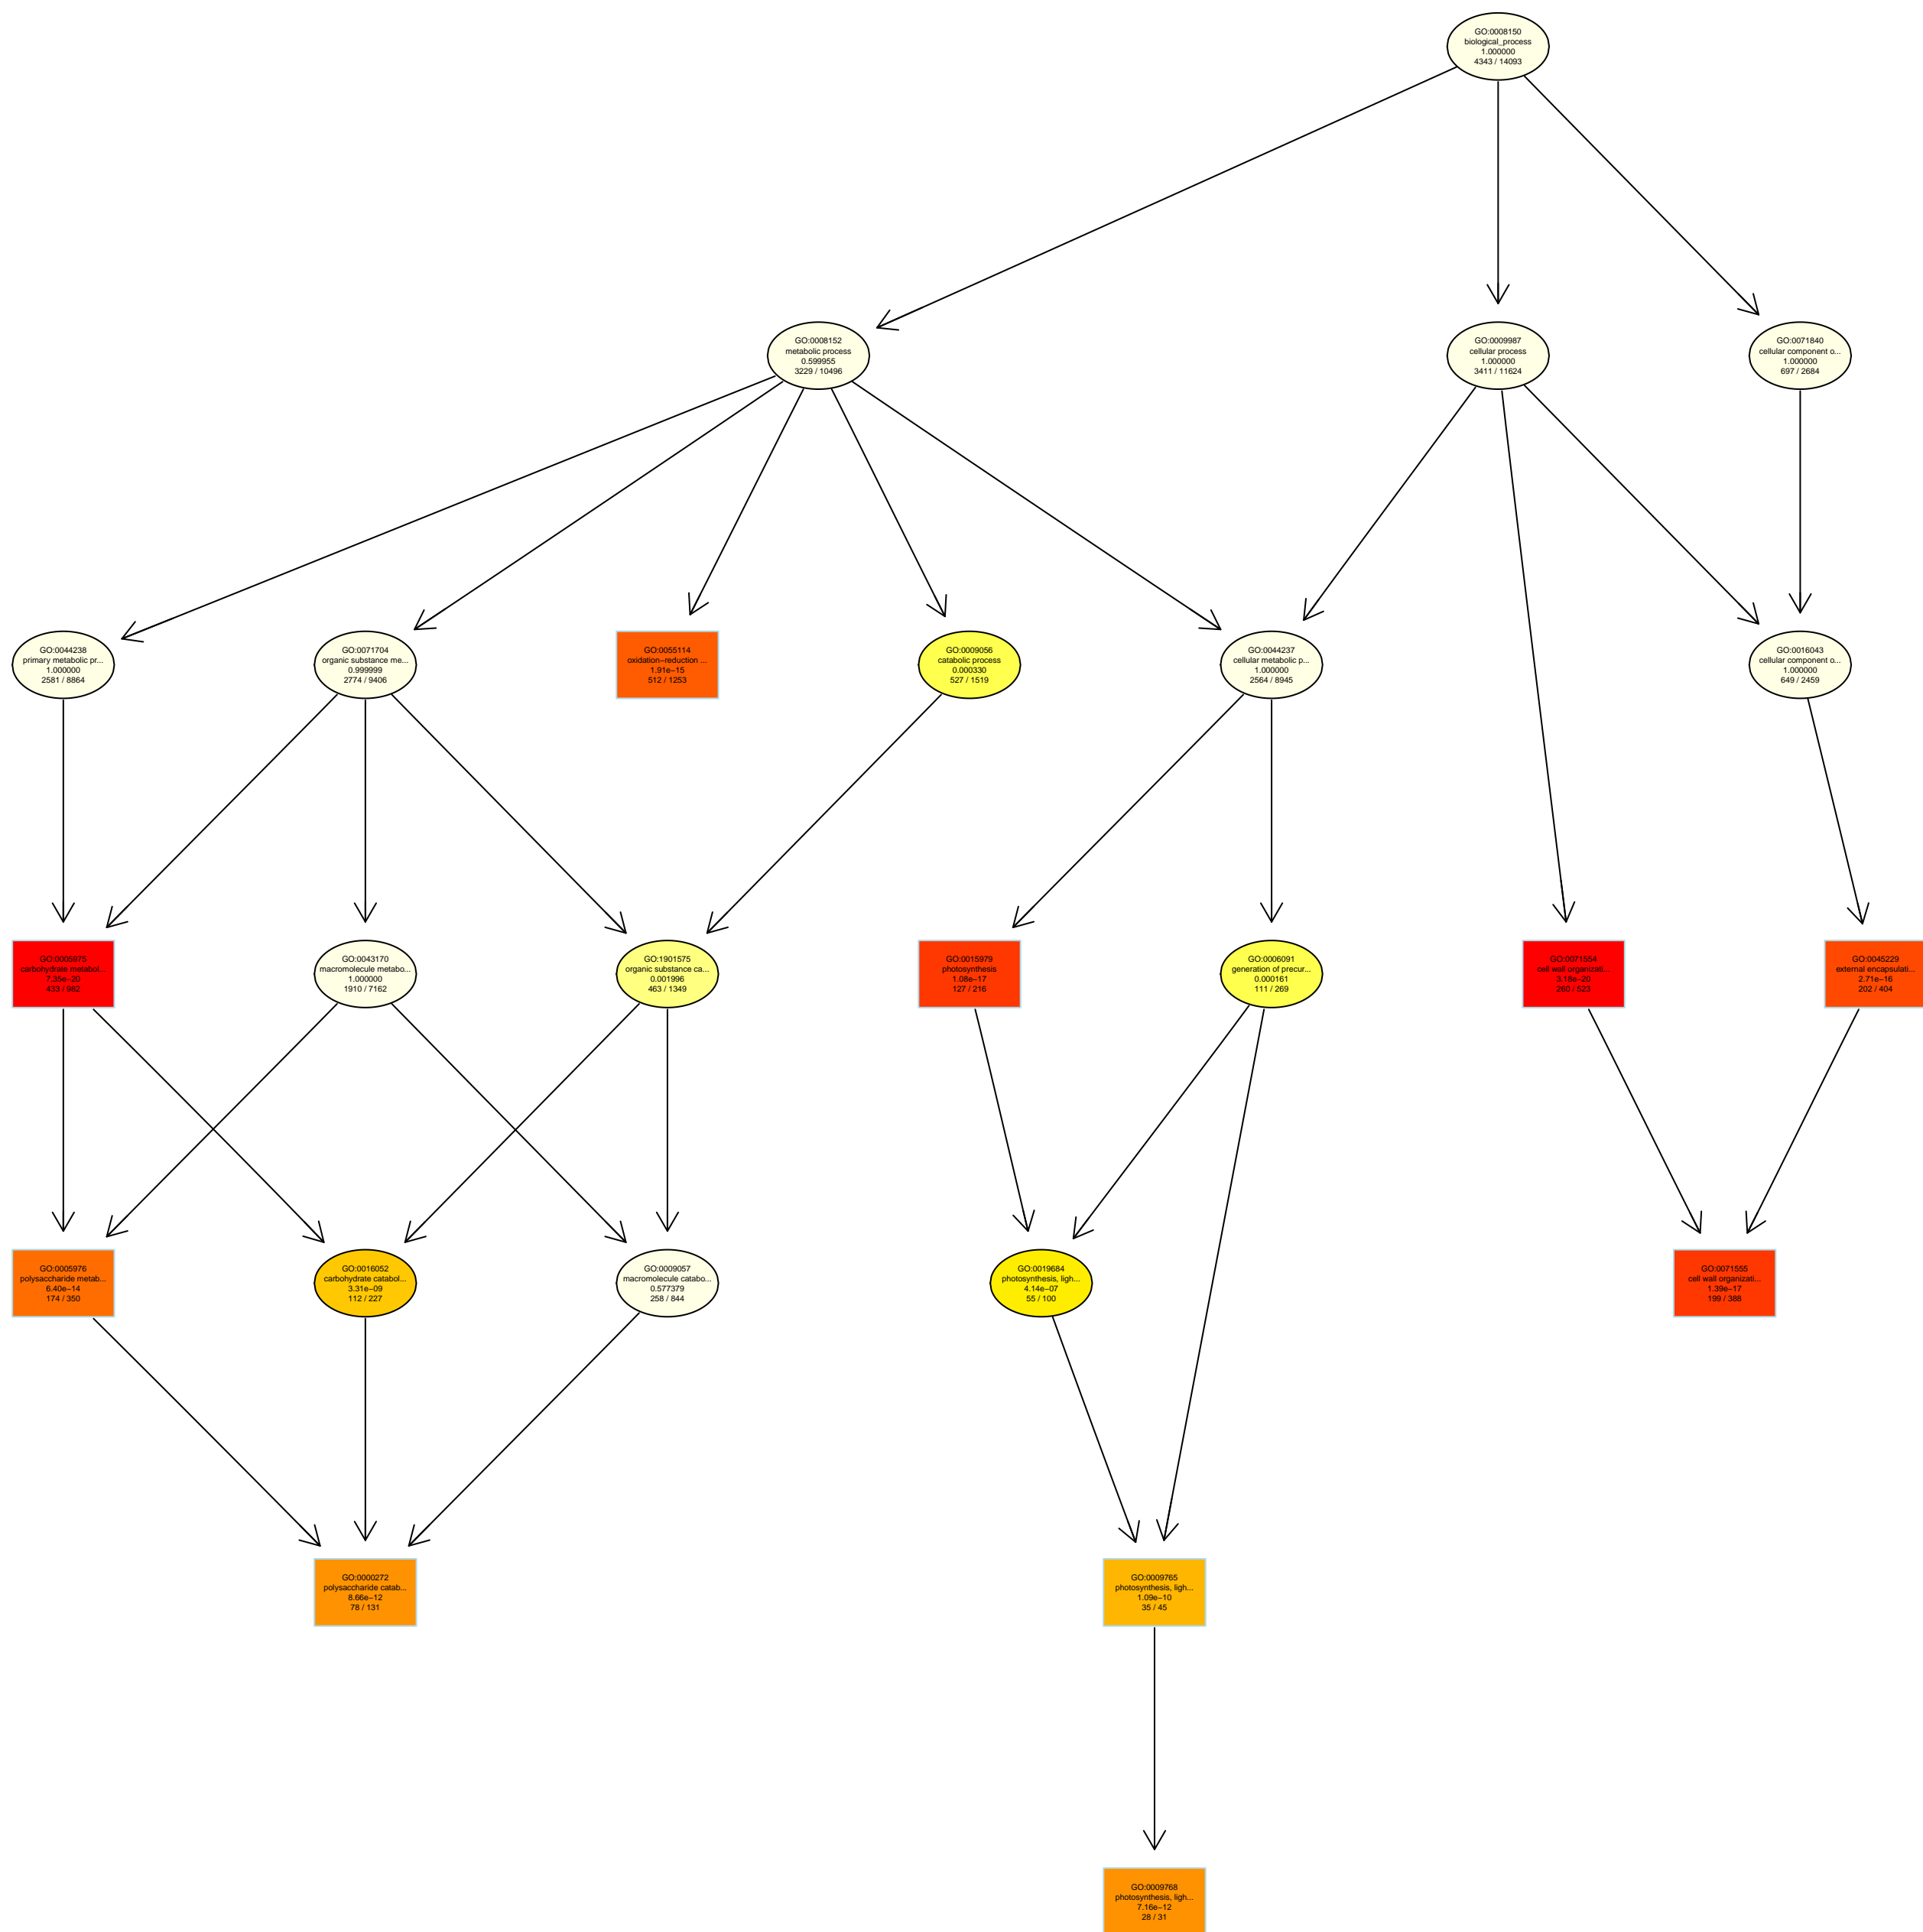

Supplement: s1 [file s1]
