# Supplementary material for: Glycoalkaloid Composition and Flavonoid Content as Driving Forces of Phytotoxicity in Diploid Potato
Source: MDPI journal article supplement (doi:10.3390/ijms24021657), 2023-01-14
Supplement: s1 [file s1]

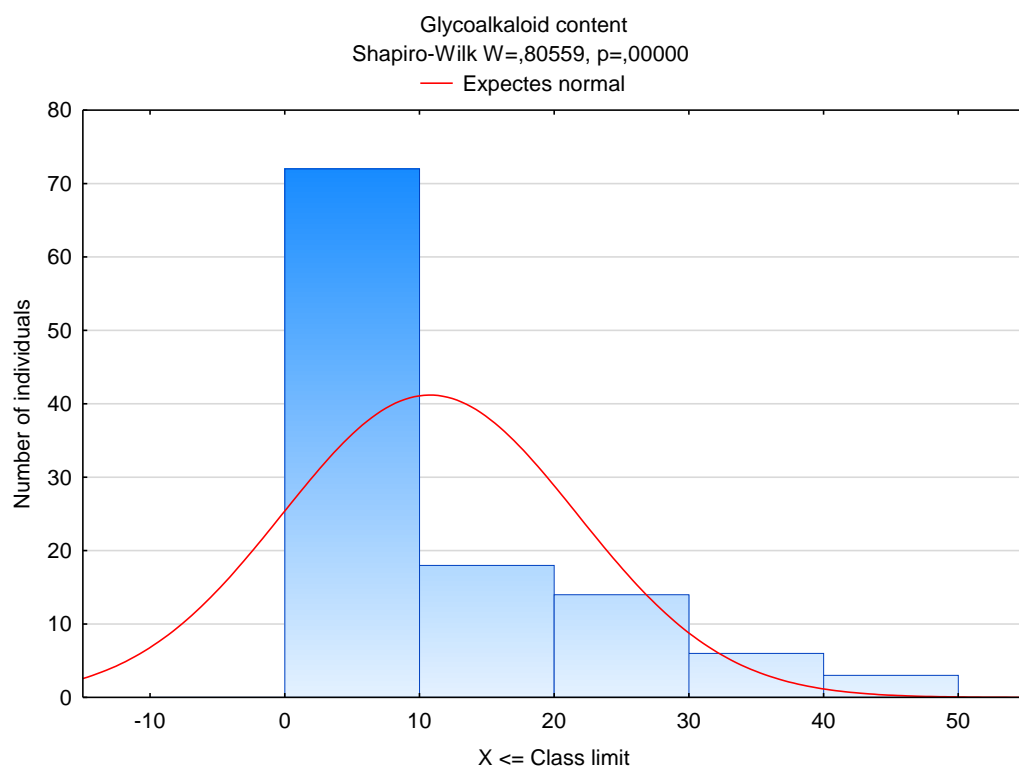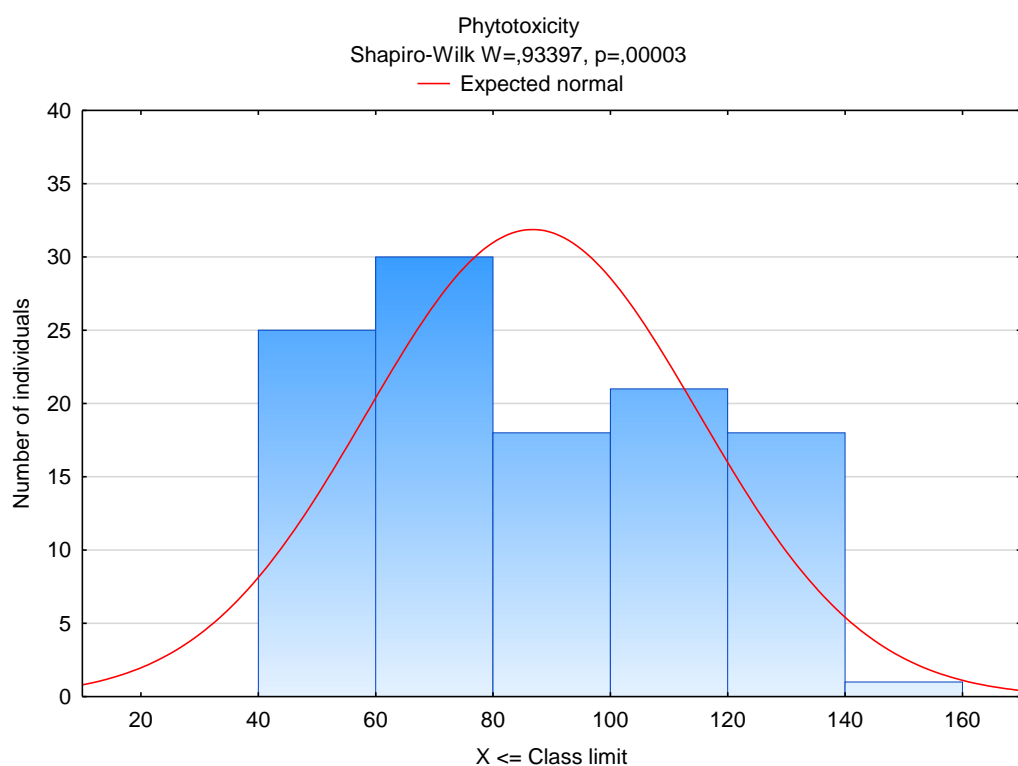

**Supplementary Figure S1.** Distribution of glycoalkaloid content and phytotoxicity in the 15-1 potato population.
